# Supplementary material for: Estimating impact of food choices on life expectancy: A modeling study
Source: PubMed Central journal article supplement (PMC8824353; doi:10.1371/journal.pmed.1003889), 2022-02-08
Supplement: pmed.1003889.s004.pdf [file pmed.1003889.s004.pdf]

Supplementary file for “Estimating impact of food choices on life expectancy: A modeling study”

**S1 Table:** Hazard ratios (with uncertainty intervals) for various food groups with uncertainty limits (orange/red labels). Reference intake and energy levels per food groups are also indicated.

| Grams                | Intake in grams/day |        |       |       |                                              |      |       |       |                                                |       |       |      |      |               | Uncertainty threshold               | No estimate threshold | Publication   | kcal/g | Examples of food | kcal/100g | % / 100 kcal | Sliders start | Standard diet           |                     | Optimized             |                 | Norway patterns   |  | US patterns |  |
|----------------------|---------------------|--------|-------|-------|----------------------------------------------|------|-------|-------|------------------------------------------------|-------|-------|------|------|---------------|-------------------------------------|-----------------------|---------------|--------|------------------|-----------|--------------|---------------|-------------------------|---------------------|-----------------------|-----------------|-------------------|--|-------------|--|
|                      | 0                   | 25     | 50    | 100   | 150                                          | 200  | 250   | 300   | 400                                            | 500   | 600   | 700  | 800  | Energy (kcal) |                                     |                       |               |        |                  |           |              |               | Optimized Energy (kcal) | Norway, mean intake | Norway, Energy (kcal) | US, mean intake | US, Energy (kcal) |  |             |  |
| Whole grains         | 1                   | 0,935  | 0,87  | 0,8   | 0,76                                         | 0,72 | 0,7   | 0,7   | 0,72                                           | 0,72  | 0,8   | 0,8  | 0,87 | 300           | Aune. Whole grain consumption       | 4                     | Oat meal,     | 400    | 0,50             | 50        | 200          | 250           | 1000                    | 61                  | 244                   | 30              | 122               |  |             |  |
| - Mid to upper/lower |                     |        | 0,01  | 0,02  | 0,03                                         | 0,04 | 0,05  | 0,06  | 0,08                                           | 0,1   | 0,12  | 0,14 | 0,16 |               |                                     |                       |               |        |                  |           |              |               |                         |                     |                       |                 |                   |  |             |  |
| Clower               |                     |        | 0,86  | 0,78  | 0,73                                         | 0,68 | 0,65  | 0,64  | 0,64                                           | 0,62  | 0,68  | 0,66 | 0,71 |               |                                     |                       |               |        |                  |           |              |               |                         |                     |                       |                 |                   |  |             |  |
| Clupper              |                     |        | 0,88  | 0,82  | 0,79                                         | 0,76 | 0,75  | 0,76  | 0,8                                            | 0,82  | 0,92  | 0,94 | 1,03 |               |                                     |                       |               |        |                  |           |              |               |                         |                     |                       |                 |                   |  |             |  |
| Veg                  | 1                   | 0,965  | 0,93  | 0,87  | 0,835                                        | 0,8  | 0,785 | 0,77  | 0,76                                           | 0,76  | 0,75  | 0,75 | 0,75 | 700           | Aune. Fruit and vegetable intake    | 2                     | Salad incl.   | 200    | 0,50             | 250       | 500          | 450           | 900                     | 255                 | 510                   | 249             | 497               |  |             |  |
| - Mid to upper/lower |                     |        | 0,015 | 0,025 | 0,04                                         | 0,05 | 0,05  | 0,05  | 0,05                                           | 0,05  | 0,06  | 0,07 | 0,08 |               |                                     |                       |               |        |                  |           |              |               |                         |                     |                       |                 |                   |  |             |  |
| Fruit                | 1                   | 0,97   | 0,94  | 0,89  | 0,865                                        | 0,84 | 0,83  | 0,82  | 0,81                                           | 0,81  | 0,81  | 0,82 | 0,84 | 700           | Aune suppl. 164 (F&veg)             | 1,5                   | Oranges, etc. | 150    | 0,53             | 200       | 300          | 400           | 600                     | 244                 | 366                   | 184             | 276               |  |             |  |
| - Mid to upper/lower | 0                   | 0      | 0,005 | 0,01  | 0,015                                        | 0,02 | 0,025 | 0,03  | 0,035                                          | 0,04  | 0,05  | 0,06 | 0,07 |               |                                     |                       |               |        |                  |           |              |               |                         |                     |                       |                 |                   |  |             |  |
| Nuts                 | 1                   | 0,84   | 0,86  | 0,9   | 0,95                                         |      |       |       |                                                |       |       |      |      | 50            | 200 Aune. Nut consumption and r     | 26                    | Pea nuts      | 2600   | 0,25             | 0         | 0            | 25            | 650                     | 11                  | 286                   | 11              | 284               |  |             |  |
| - Mid to upper/lower |                     | 0,02   | 0,04  | 0,08  | 0,12                                         |      |       |       |                                                |       |       |      |      |               |                                     |                       |               |        |                  |           |              |               |                         |                     |                       |                 |                   |  |             |  |
| Legumes              | 1                   |        | 0,9   | 0,9   | 0,8                                          |      |       | 0,75  | 0,72                                           | 0,71  | 0,72  |      |      | 250           | 625 Schwingshackl. Food groups a    | 5                     | Boiled chick  | 500    | 0,20             | 0         | 0            | 200           | 1000                    | 6                   | 30                    | 9               | 43                |  |             |  |
| - Mid to upper/lower |                     | 0,015  | 0,03  | 0,05  | 0,075                                        | 0,1  | 0,125 | 0,15  | 0,2                                            | 0,25  | 0,3   |      |      |               |                                     |                       |               |        |                  |           |              |               |                         |                     |                       |                 |                   |  |             |  |
| Fish                 | 1                   |        | 0,95  | 0,93  | 0,9                                          | 0,88 | 0,86  | 0,86  | 0,88                                           | 0,88  | 0,9   |      |      | 300           | 625 Schwingshackl. Food groups a    | 6                     | Mackerel,     | 600    | 0,12             | 50        | 300          | 200           | 1200                    | 82                  | 492                   | 17              | 99                |  |             |  |
| - Mid to upper/lower |                     | 0,02   | 0,025 | 0,03  | 0,04                                         | 0,06 | 0,08  | 0,12  | 0,16                                           | 0,2   | 0,25  |      |      |               |                                     |                       |               |        |                  |           |              |               |                         |                     |                       |                 |                   |  |             |  |
| Egg                  | 1                   | 0,98   | 1,05  | 1,3   | 1,5                                          |      |       |       |                                                |       |       |      |      | 100           | 225 Schwingshackl. Food groups a    | 6                     | Egg, boiled   | 600    | 0,13             | 50        | 300          | 25            | 150                     | 36                  | 216                   | 44              | 264               |  |             |  |
| - Mid to upper/lower |                     | 0,06   | 0,06  | 0,07  | 0,1                                          | 0,15 |       |       |                                                |       |       |      |      |               |                                     |                       |               |        |                  |           |              |               |                         |                     |                       |                 |                   |  |             |  |
| Milk                 | 1                   |        | 0,985 | 0,97  | 0,97                                         | 0,98 | 0,99  | 1,015 | 1,04                                           | 1,065 | 1,09  |      |      |               | Schwingshackl. Food groups a        | 1,7                   | Milk, 1% fat  | 170    | 0,09             | 300       | 510          | 200           | 340                     | 225                 | 383                   | 434             | 737               |  |             |  |
| - Mid to upper/lower |                     | 0,01   | 0,015 | 0,015 | 0,0175                                       | 0,02 | 0,02  | 0,02  | 0,025                                          | 0,03  | 0,035 | 0,04 |      |               |                                     |                       |               |        |                  |           |              |               |                         |                     |                       |                 |                   |  |             |  |
| Refined grains       | 1                   |        | 0,94  | 0,98  | 1,03                                         | 1,09 | 1,16  | 1,24  | 1,4                                            | 1,57  |       |      |      | 200           | 525 Schwingshackl. Food groups a    | 11                    | Bread with    | 1100   | 0,11             | 150       | 1650         | 50            | 550                     | 172                 | 1892                  | 159             | 1753              |  |             |  |
| - Mid to upper/lower |                     | 0,03   | 0,06  | 0,07  | 0,1                                          | 0,13 | 0,16  | 0,19  | 0,25                                           | 0,31  |       |      |      |               |                                     |                       |               |        |                  |           |              |               |                         |                     |                       |                 |                   |  |             |  |
| Meat, red            | 1                   | 1,05   | 1,09  | 1,18  | 1,3                                          | 1,42 | 1,54  | 1,66  | 1,9                                            | 2,14  | 2,38  |      |      | 250           | 625 Schwingshackl. Food groups a    | 7                     | Cutlets, ch   | 700    | -0,30            | 100       | 700          | 0             | 0                       | 93                  | 651                   | 95              | 665               |  |             |  |
| - Mid to upper/lower | 0                   | 0,005  | 0,01  | 0,02  | 0,035                                        | 0,05 | 0,07  | 0,12  | 0,17                                           | 0,22  | 0,3   |      |      |               |                                     |                       |               |        |                  |           |              |               |                         |                     |                       |                 |                   |  |             |  |
| Meat, processed      | 1                   | 1,1    | 1,18  | 1,3   | 1,43                                         | 1,57 | 1,71  | 1,85  | 2,13                                           | 2,41  | 2,69  |      |      | 250           | 625 Schwingshackl. Food groups a    | 19                    | Bacon         | 1900   | -0,15            | 50        | 950          | 0             | 0                       | 73                  | 1387                  | 53              | 1003              |  |             |  |
| - Mid to upper/lower | 0                   | 0,01   | 0,02  | 0,05  | 0,1                                          | 0,15 | 0,2   | 0,25  | 0,32                                           | 0,4   | 0,5   |      |      |               |                                     |                       |               |        |                  |           |              |               |                         |                     |                       |                 |                   |  |             |  |
| Meat, white          | 1                   | 1      | 1     | 1     | 1                                            | 1    | 1     | 1     | 1                                              | 1     |       |      |      | 0             | 625 Abete. Association between ti   | 10                    | Chicken le    | 1000   | 0,00             | 75        | 750          | 50            | 500                     | 50                  | 500                   | 75              | 750               |  |             |  |
| - Mid to upper/lower | 0                   | 0,05   | 0,1   | 0,2   | 0,25                                         | 0,3  | 0,35  | 0,4   | 0,45                                           | 0,5   | 0,2   |      |      |               |                                     |                       |               |        |                  |           |              |               |                         |                     |                       |                 |                   |  |             |  |
| Sugar sweetened bev  | 1                   | 1,0075 | 1,015 | 1,03  | 1,045                                        | 1,06 | 1,07  | 1,08  | 1,1                                            | 1,12  | 1,14  | 1,16 | 1,18 | 400           | Schwingshackl. Food groups a        | 2                     | Lemonade      | 200    | -0,15            | 500       | 1000         | 0             | 0                       | 425                 | 850                   | 621             | 1242              |  |             |  |
| - Mid to upper/lower | 0                   | 0,0125 | 0,025 | 0,05  | 0,055                                        | 0,06 | 0,065 | 0,07  | 0,08                                           | 0,09  | 0,1   | 0,11 | 0,14 |               |                                     |                       |               |        |                  |           |              |               |                         |                     |                       |                 |                   |  |             |  |
| Added oils           | 1                   | 1      | 1     | 1     |                                              |      |       |       |                                                |       |       |      |      | 0             | 225 Abdelhamid, A.S., et al., Polyu | 37                    | Rapeseed      | 3700   | 0,14             | 25        | 925          | 25            | 925                     | 30                  | 1110                  | 21              | 777               |  |             |  |
| - Mid to upper/lower | 0                   | 0,05   | 0,1   | 0,2   |                                              |      |       |       |                                                |       |       |      |      |               |                                     |                       |               |        |                  |           |              |               |                         |                     |                       |                 |                   |  |             |  |
|                      |                     |        |       |       | Orange label: Uncertain estimates (moderate) |      |       |       | Red label: No estimate (very high uncertainty) |       |       |      |      |               |                                     |                       |               |        |                  |           |              |               |                         |                     |                       |                 |                   |  |             |  |
|                      |                     |        |       |       |                                              |      |       |       |                                                |       |       |      |      |               | Total estimates                     |                       |               |        |                  |           | 1 800        | 8 085         | 7 815                   | 1 763               | 8 917                 |                 | 8 512             |  |             |  |
