# Supplementary material for: Estimating impact of food choices on life expectancy: A modeling study
Source: PubMed Central journal article supplement (PMC8824353; doi:10.1371/journal.pmed.1003889), 2022-02-08
Supplement: pmed.1003889.s005.pdf [file pmed.1003889.s005.pdf]

Supplementary file for “Estimating impact of food choices on life expectancy: A modeling study”

**S2 Table:** Increase in life expectancy (LE) for each food group change for 20- and 60-year-old female and male adults from the United States, who changes from a typical Western diet (TW) to optimized (OD) or feasibility approach (FA). Estimates per food groups and total change in life expectancy is presented with 95% uncertainty intervals (UI).

| Food group                | Diet         |              |              | Life years gained for adults from the United States (95% UI) |                        |                      |                        |                                         |                      |                    |                       |
|---------------------------|--------------|--------------|--------------|--------------------------------------------------------------|------------------------|----------------------|------------------------|-----------------------------------------|----------------------|--------------------|-----------------------|
|                           |              |              |              | 20 years of age when initiating changes                      |                        |                      |                        | 60 years of age when initiating changes |                      |                    |                       |
|                           |              |              |              | Female                                                       |                        | Male                 |                        | Female                                  |                      | Male               |                       |
|                           | TW.<br>g/day | FA.<br>g/day | OD.<br>g/day | TW->FA                                                       | TW->OD                 | TW->FA               | TW->OD                 | TW->FA                                  | TW->OD               | TW->FA             | TW->OD                |
| Legumes                   | 0            | 100          | 200          | 1.1 (0.6;1.6)                                                | 2.2 (1.2;3.5)          | 1.2 (0.6;1.8)        | 2.5 (1.3;4.0)          | 0.8 (0.4;1.1)                           | 1.6 (0.9;2.5)        | 0.8 (0.4;1.2)      | 1.6 (0.9;2.6)         |
| Whole grains              | 50           | 137.5        | 225          | 1.2 (0.9;1.6)                                                | 2.0 (1.4;2.7)          | 1.4 (1.0;1.8)        | 2.3 (1.6;3.0)          | 0.9 (0.6;1.2)                           | 1.4 (1.0;1.9)        | 0.9 (0.7;1.2)      | 1.5 (1.1;2.0)         |
| Nuts                      | 0            | 12.5         | 25           | 0.8 (0.7;0.9)                                                | 1.7 (1.5;2.0)          | 1.0 (0.8;1.1)        | 2.0 (1.7;2.3)          | 0.6 (0.5;0.7)                           | 1.2 (1.1;1.4)        | 0.6 (0.5;0.7)      | 1.3 (1.1;1.5)         |
| Fish                      | 50           | 125          | 200          | 0.3 (-0.2;0.8)                                               | 0.5 (-0.2;1.3)         | 0.3 (-0.3;0.9)       | 0.6 (-0.2;1.5)         | 0.2 (-0.1;0.6)                          | 0.4 (-0.1;0.9)       | 0.2 (-0.1;0.6)     | 0.4 (-0.1;0.9)        |
| Fruits                    | 200          | 300          | 400          | 0.2 (-0.2;0.7)                                               | 0.4 (-0.1;0.9)         | 0.3 (-0.3;0.8)       | 0.4 (-0.2;1.0)         | 0.2 (-0.1;0.5)                          | 0.3 (-0.1;0.6)       | 0.2 (-0.2;0.6)     | 0.3 (-0.1;0.6)        |
| Vegetables                | 250          | 325          | 400          | 0.2 (-0.9;1.3)                                               | 0.3 (-0.6;1.4)         | 0.3 (-1.0;1.3)       | 0.4 (-0.9;1.5)         | 0.2 (-0.7;0.9)                          | 0.2 (-0.5;1.0)       | 0.2 (-0.5;1.0)     | 0.2 (-0.4;1.1)        |
| White meat                | 75           | 62.5         | 50           | 0.0 (-2.3;1.8)                                               | 0.0 (-2.0;1.7)         | 0.0 (-2.4;2.4)       | 0.0 (-2.7;2.1)         | 0.0 (-1.7;1.4)                          | 0.0 (-1.5;1.5)       | 0.0 (-1.6;1.4)     | 0.0 (-1.7;1.5)        |
| Milk/dairy                | 300          | 250          | 200          | 0.1 (-0.3;0.4)                                               | 0.1 (-0.2;0.4)         | 0.1 (-0.3;0.5)       | 0.1 (-0.2;0.5)         | 0.0 (-0.2;0.3)                          | 0.1 (-0.1;0.3)       | 0.0 (-0.2;0.3)     | 0.1 (-0.1;0.3)        |
| Eggs                      | 50           | 37.5         | 25           | 0.3 (-0.6;1.3)                                               | 0.7 (-0.2;1.7)         | 0.4 (-0.6;1.4)       | 0.8 (-0.2;1.9)         | 0.2 (-0.4;0.9)                          | 0.5 (-0.2;1.1)       | 0.3 (-0.3;0.9)     | 0.5 (-0.2;1.2)        |
| Refined grains            | 150          | 100          | 50           | 0.5 (-0.7;1.8)                                               | 0.9 (-0.3;2.2)         | 0.6 (-1.0;2.2)       | 1.1 (-0.5;2.5)         | 0.4 (-0.6;1.4)                          | 0.7 (-0.3;1.5)       | 0.4 (-0.7;1.2)     | 0.7 (-0.3;1.5)        |
| Sugar-sweetened beverages | 500          | 250          | 0            | 0.5 (-0.7;1.6)                                               | 1.1 (0.3;1.8)          | 0.5 (-0.7;1.8)       | 1.3 (0.3;2.1)          | 0.3 (-0.5;1.0)                          | 0.8 (0.2;1.3)        | 0.3 (-0.4;1.1)     | 0.8 (0.2;1.4)         |
| Red meat                  | 100          | 50           | 0            | 0.8 (0.6;1.0)                                                | 1.6 (1.5;1.8)          | 0.9 (0.7;1.1)        | 1.9 (1.7;2.1)          | 0.6 (0.4;0.7)                           | 1.2 (1.1;1.3)        | 0.6 (0.4;0.7)      | 1.2 (1.1;1.3)         |
| Processed meat            | 50           | 25           | 0            | 0.7 (0.5;0.9)                                                | 1.6 (1.5;1.8)          | 0.8 (0.6;1.1)        | 1.9 (1.7;2.1)          | 0.5 (0.4;0.7)                           | 1.2 (1.1;1.3)        | 0.5 (0.4;0.7)      | 1.2 (1.1;1.3)         |
| <b>Total</b>              |              |              |              | <b>6.2 (3.5;8.1)</b>                                         | <b>10.7 (8.4;12.3)</b> | <b>7.3 (4.7;9.5)</b> | <b>13.0 (9.4;14.3)</b> | <b>4.5 (2.7;6.1)</b>                    | <b>8.0 (6.2;9.3)</b> | <b>4.8 (3;6.4)</b> | <b>8.8 (6.8;10.0)</b> |

\* Uncertainty intervals for some food groups have rounding differences in the last digit compared to corresponding figures due to figures are automatically adjusted to be symmetrical through the admegan package in Stata..
