# Supplementary material for: Estimating impact of food choices on life expectancy: A modeling study
Source: PubMed Central journal article supplement (PMC8824353; doi:10.1371/journal.pmed.1003889), 2022-02-08
Supplement: pmed.1003889.s006.pdf [file pmed.1003889.s006.pdf]

**S3 Table:** Absolute and relative change in life expectancy with delay to full effects of 10 (default), 5, 30 and 50 years for 20-, 40-, 60- and 80-year-old females and males from the United States.

| Age | Sex    | Estimate | Absolute change (years) |        |         |         | Relative change (proportion) |        |         |         |
|-----|--------|----------|-------------------------|--------|---------|---------|------------------------------|--------|---------|---------|
|     |        |          | 10-year                 | 5-year | 30-year | 50-year | 10-year                      | 5-year | 30-year | 50-year |
| 20  | Female | 10.7     | 0                       | 0.1    | -0.4    | -1.3    | 0                            | 0.01   | -0.04   | -0.12   |
| 20  | Male   | 13.0     | 0                       | 0.2    | -0.9    | -2.2    | 0                            | 0.02   | -0.07   | -0.17   |
| 40  | Female | 10.0     | 0                       | 0.2    | -1.2    | -3.4    | 0                            | 0.02   | -0.12   | -0.34   |
| 40  | Male   | 11.7     | 0                       | 0.3    | -1.8    | -4.7    | 0                            | 0.03   | -0.15   | -0.40   |
| 60  | Female | 8.0      | 0                       | 0.5    | -2.8    | -5.3    | 0                            | 0.06   | -0.35   | -0.66   |
| 60  | Male   | 8.8      | 0                       | 0.8    | -3.6    | -6.1    | 0                            | 0.09   | -0.41   | -0.69   |
| 80  | Female | 3.4      | 0                       | 1.2    | -2.4    | -2.8    | 0                            | 0.35   | -0.71   | -0.82   |
| 80  | Male   | 3.4      | 0                       | 1.3    | -2.4    | -2.9    | 0                            | 0.38   | -0.71   | -0.85   |
