# Supplementary material for: Estimating impact of food choices on life expectancy: A modeling study
Source: PubMed Central journal article supplement (PMC8824353; doi:10.1371/journal.pmed.1003889), 2022-02-08

# Optimal

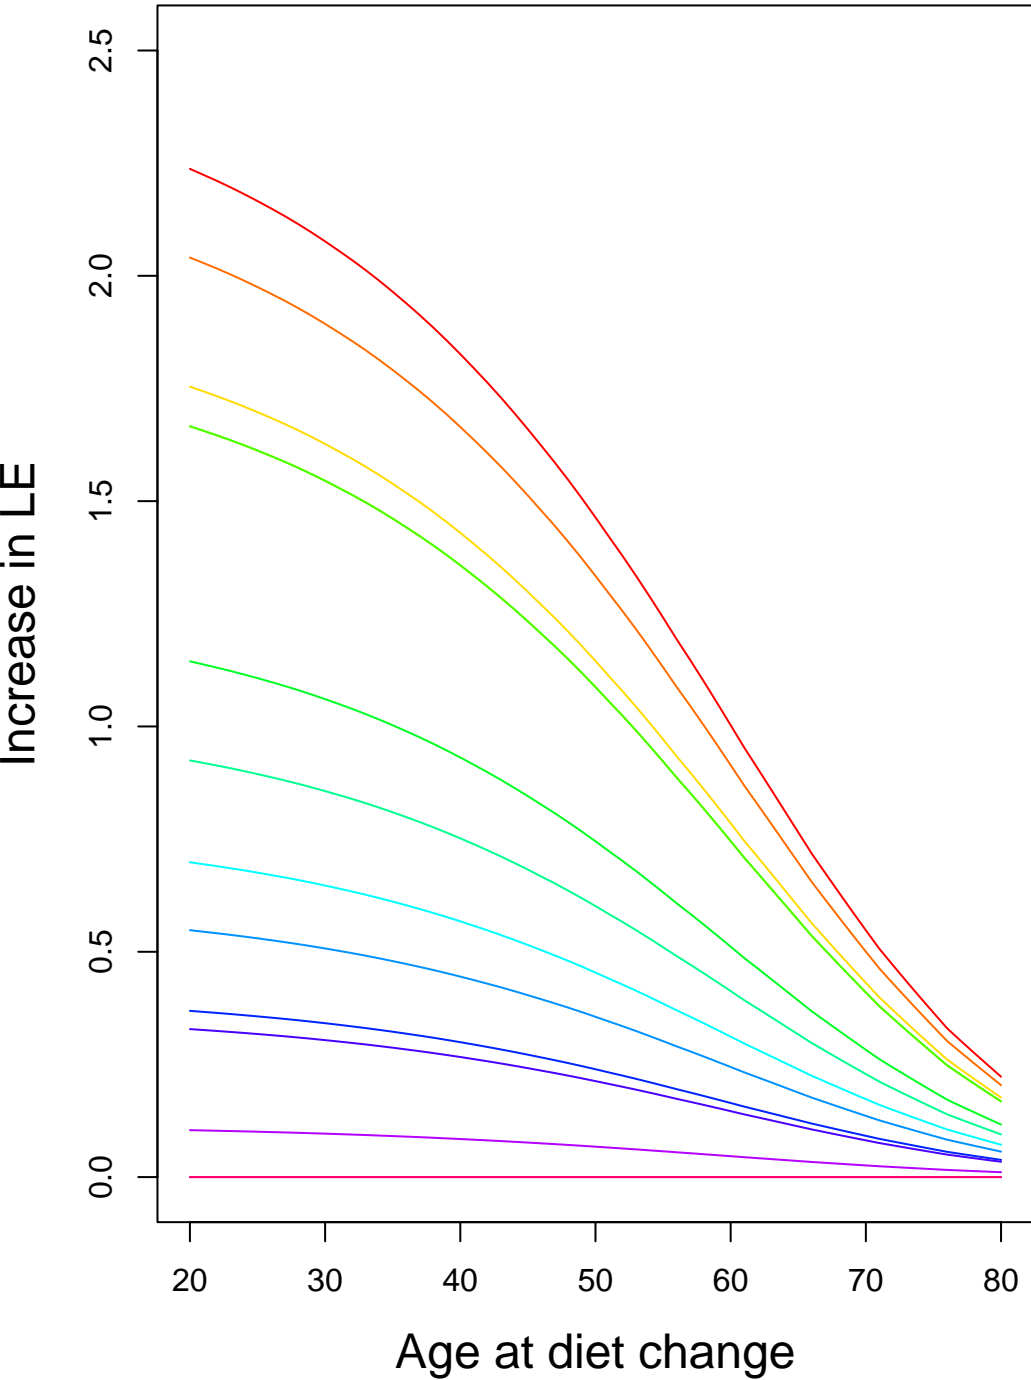

# Feasible

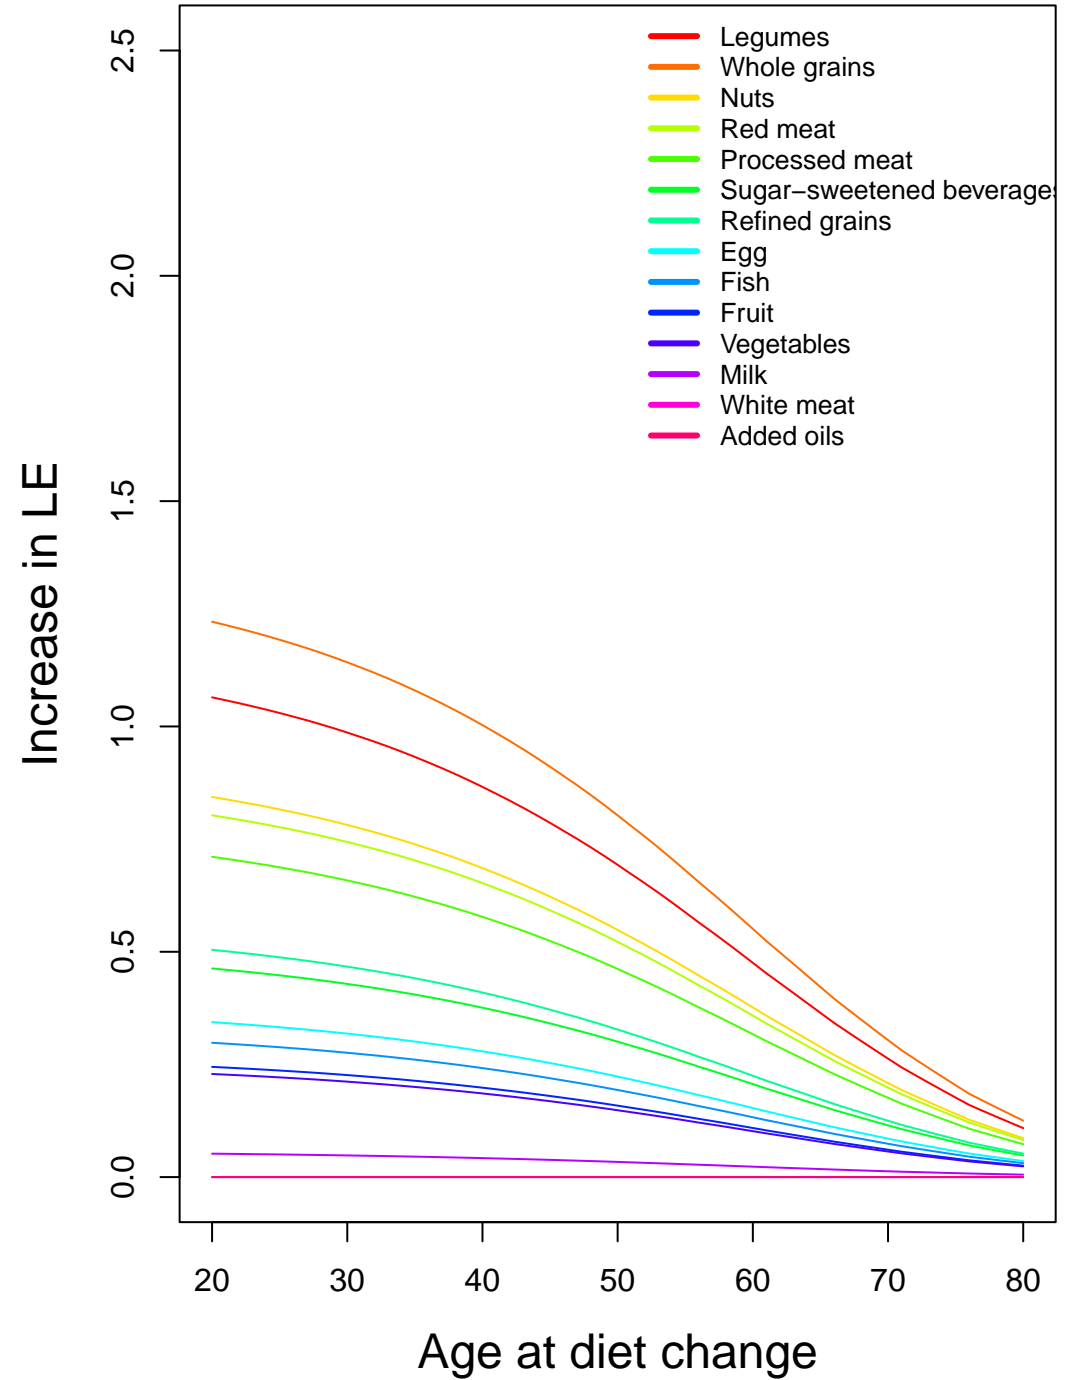

Supplement: pmed.1003889.s023.pdf [file pmed.1003889.s023.pdf]
